# Supplementary material for: Two genetically confirmed Japanese cases of Birt Hogg Dube syndrome presenting with pneumothorax including early onset bilateral renal tumors in one case
Source: Research Square preprint supplement (doi:10.21203/rs.3.rs-7957154/v1), 2025-12-15
Supplement: Supplementary file 1 [file f472ea9eacfe2dbc80b5bdc1.docx]

Research Square / In Review — Preprint Summary (150–200 words)

Background: Birt–Hogg–Dubé (BHD) syndrome is an autosomal dominant disorder caused by pathogenic variants in FLCN, typically presenting with multiple pulmonary cysts, spontaneous pneumothorax, cutaneous fibrofolliculomas, and renal tumors that usually arise in middle age.

Case report: We describe two genetically confirmed Japanese patients with BHD and contrasting phenotypes. Case 1 was a 25‑year‑old woman with recurrent bilateral pneumothorax and basilar‑predominant subpleural lung cysts; sequencing identified FLCN c.1062+1G>A. She had no renal lesions on imaging and remains under surveillance. Case 2 was a 29‑year‑old man with right pneumothorax, numerous basal cysts, multiple facial papules, and bilateral renal masses; genetic testing detected FLCN c.1285dupC (exon 11). Bilateral partial nephrectomies confirmed hybrid oncocytic/chromophobe tumors. Both patients provided written consent for participation and publication.

Conclusions: These cases underscore the importance of considering BHD in young patients with recurrent pneumothorax and highlight the potential for early‑onset renal tumors. Early genetic confirmation facilitates risk‑adapted renal surveillance and nephron‑sparing management. The preprint will be updated following peer review.
